# Supplementary material
Source: PubMed Central journal article supplement (PMC2742825)
Supplement: supp_M109.006692_jbc.M109.006692-1.pdf [file supp_M109.006692_jbc.M109.006692-1.pdf]

## SUPPLEMENTAL DATA

### Primers used for cloning

| Primer                 | Sequence (5'-3')                       |
|------------------------|----------------------------------------|
| At-CK2A1 5' NdeI       | ATACATATGTCGAAAGCTCGTGTGTACACCG        |
| At-CK2A1 3' BamHI      | AGTGGATCCTCATTTGACTTCTCATTCTGCTGG      |
| At-CK2A1 5' BspHI      | AGCTAGCTTCATGATGTTCGAAAGCTCGTGTG       |
| At-CK2A1 3' XhoI       | GCTCTCGAGTTGACTTCTCATTCTGC             |
| At-CK2A2 5' NcoI       | ACTGCCATGGGTTTCGAAAGCTCGTG             |
| At-CK2A2 3' XhoI       | AGCTCTCGAGTTGAGTCCTCATTCTGC            |
| At-CK2A3 5' NdeI       | CCACATATGTCGAAAGCTAGGGTTTATAC          |
| At-CK2A3 3' NotI       | CGAGTGCGGCCCGCTGAGTTCGTAGTCTGCTGC      |
| At-CK2Acp 5' NdeI      | GACTCATATGGCCTTAAGGCCTTGTAC            |
| At-CK2Acp 3' XhoI      | TGTGCTCGAGCTGGCTGCGCGGCGTACGG          |
| At-CK2B1 5' NcoI       | ACTGCCATGGGTTATAGAGACAGAGG             |
| At-CK2B1 3' XhoI       | GGACCTCGAGCGGTTTGTGTAATTTGAACC         |
| At-CK2B2 5' NcoI       | AGCTCCATGGGTTATAGGGAGAGAGGTA           |
| At-CK2B2 3' XhoI       | AGCTCTCGAGCGGCTTGTGTAGCTT              |
| At-CK2B3 5' NcoI       | AGCTCCATGGGTTACAAGGAACGTAGTGGA         |
| At-CK2B3 3' XhoI       | GATCTCGAGTGGTTTGTGTACCTTGAAGCC         |
| At-CK2B4 5' NcoI       | GCACCCATGGATGTACAAGGATCGGAGTGG         |
| At-CK2B4 3' XhoI       | TGTGCTCGAGTTGTTTGTGTGTACCTTAAAGCC      |
| At-HD2B 5' NcoI        | AGCTAGCTCCATGGAGTTCTGGGGAGTTGCGG       |
| At-HD2B 3' XhoI        | AGCTCTCGAGAGCTCTACCCTTCCCTT            |
| At-eIF2alpha 5'NcoI    | ACGTCCATGGCGAATCCTGCTCCGAATCTAG        |
| At-eIF2alpha 3'XhoI    | GACTCTCGAGTTCAATTATCCCGCTACCTCC        |
| Ta-eIF2alpha 5' NdeI   | CAGCCATATGGCGAACCTCGAGTGC              |
| Ta-eIF2alpha 3' BamEco | GAATTCGGATCCTTAGTCCGCATGGAC            |
| At-eIF2beta 5'BamHI    | ATGACTGATGGATCCAAGGAGATATACATATGGCTGAT |
| At-eIF2beta 3'SalI     | TGCTATGCTGTCGACTCATTATTAAGTCTTCCTG     |
| Ta-eIF3c 5' NcoI       | AGCTCCATGGCGTCTCTGTTTTTTGGGGAC         |
| Ta-eIF3c 3' SacI       | AGCTGAGCTCCTAATTTCTACCAGGCC            |
| Ta-eIF3c 3' XhoI       | AGCTCTCGAGATTTCTACCAGGCCTG             |
| At-eIF5 5' NcoI        | ACTAGTACTGATCCATGGCGCTGC               |
| At-eIF5 3' BamHI       | CAGATCAGTGGATCCTTATTAATCCTCCTCTTCGG    |

**Subcellular localization of *A. thaliana* CK2 subunits.** Salinas *et al.* have characterized the subcellular localization of all *A. thaliana* CK2 proteins by fusion protein expression (14). The Cell eFP Browser depicts data from the SUBA database (<http://www.plantenergy.uwa.edu.au/suba2/>) which contains both computationally predicted and experimentally documented subcellular localization data for *A. thaliana* proteins based on mass spectroscopic analysis of subcellular fractions and fluorescent fusion proteins ([www.bar.utoronto.ca/](http://www.bar.utoronto.ca/)).

| <b>Subunit</b>  | <b>Fusion Protein Expression</b>         | <b>Cell eFP</b>               |
|-----------------|------------------------------------------|-------------------------------|
| CK2 $\alpha$ 1  | At5g67380 Nuclear, enriched in nucleolus | Mitochondrial and Cytoplasmic |
| CK2 $\alpha$ 2  | At3g50000 Nuclear, enriched in nucleolus | Cytoplasmic                   |
| CK2 $\alpha$ 3  | At2g23080 Nuclear                        | N/A                           |
| CK2 $\alpha$ cp | At2g23070 Chloroplastic                  | Chloroplastic                 |
| CK2 $\beta$ 1   | At5g47080 Nuclear and Cytoplasmic        | Nuclear                       |
| CK2 $\beta$ 2   | At4g17640 Nuclear                        | Nuclear                       |
| CK2 $\beta$ 3   | At3g60250 Nuclear and Cytoplasmic        | Nuclear                       |
| CK2 $\beta$ 4   | At2g44680 Cytoplasmic                    | Nuclear and Cytoplasmic       |

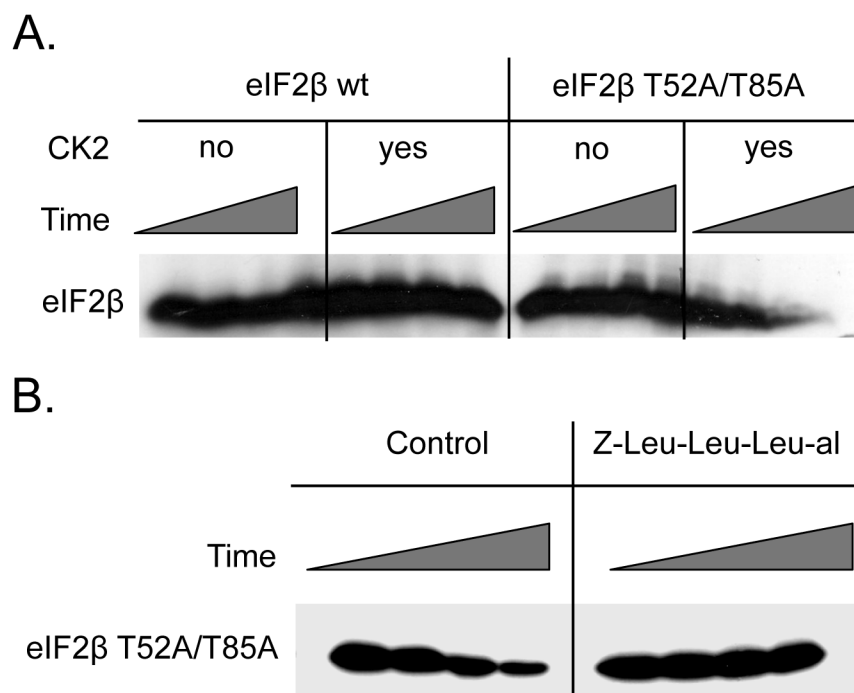

**Figure Legend: CK2 phosphorylation sites may regulate the degradation of eIF2 $\beta$ .** Panel A. Wild-type recombinant wheat eIF2 $\beta$  or eIF2 $\beta$  T52A/T85A (5  $\mu$ g) was incubated with wheat germ S30 extract (150  $\mu$ g) in the presence of 20 mM Hepes-KOH, pH 7.6, 5 mM MgCl<sub>2</sub>, 0.2 mM ATP, 250 nM Calyculin A, and CK2 $\alpha$ 2 $\beta$ 4 (100 ng) as indicated. Each 50  $\mu$ l reaction was incubated at 37° C for 0-3 hrs and stopped with 1% SDS. 10  $\mu$ l of each reaction was separated by 12.5% SDS-PAGE, transferred to PVDF, and analyzed with 1/5000 dilution of rabbit antisera to eIF2 $\beta$ . Panel B. A similar reaction was run in the presence and absence of the proteasome inhibitor Z-Leu-Leu-Leu-al (M132, Sigma). Recombinant wheat eIF2 $\beta$  T52A/T85A (5  $\mu$ g) was incubated with wheat germ S30 extract (150  $\mu$ g) in the presence of 20 mM Hepes-KOH, pH 7.6, 5 mM MgCl<sub>2</sub>, 0.2 mM ATP, 250 nM Calyculin A, and CK2 $\alpha$ 2 $\beta$ 4 (100 ng). Each 50  $\mu$ l reaction was incubated at 37° C for 0-3 hrs and stopped with 1% SDS. 10  $\mu$ l of each reaction was separated by 12.5% SDS-PAGE, transferred to PVDF, and analyzed with 1/5000 dilution of rabbit antisera to eIF2 $\beta$ .

### Results:

In the presence of CK2, the phosphorylation of eIF2 $\beta$  may prevent its degradation upon exposure to wheat germ extract, as the non-phosphorylatable T52A/T85A mutant is degraded over time (panel A). A similar effect is not observed in the absence of exogenous CK2, nor with wild-type eIF2 $\beta$  suggesting that this does not appear to be a direct effect of phosphorylation. The degradation of eIF2 $\beta$  T52A/T85A was prevented by the proteasome inhibitor Z-Leu-Leu-Leu-al, (panel B), suggesting the degradation of recombinant eIF2 $\beta$  by wheat germ extract is taking place via the proteasome. These results suggest that the phosphorylation of eIF2 $\beta$  by CK2 may be related to protein stability through both direct and indirect means.
